# Supplementary material for: Sterilization Induced Changes in Polypropylene-Based Ffp2 Masks
Source: MDPI journal article supplement (doi:10.3390/polym13234107), 2021-11-25
Supplement: s1 [file s1]

## Supplementary

# Sterilization Induced Changes in Polypropylene-Based Ffp2 Masks

Emmanuel Richaud <sup>1,\*</sup>, Muriel Ferry <sup>2</sup>, Floriane Carpentier <sup>2</sup>, Sophie Rouif <sup>3</sup>, Laurent Cortella <sup>4</sup>  
and Stéphane Esnouf <sup>2</sup>

<sup>1</sup> PIMM UMR 8006, Arts et Metiers ParisTech, CNRS, CNAM, 151 bd de l'Hopital, 75013 Paris, France

<sup>2</sup> CEA, Service d'Etude du Comportement des Radionucléides, Université Paris-Saclay, 91191 Gif-sur-Yvette, France; MURIEL.FERRY@cea.fr (M.F.); Floriane.CARPENTIER@cea.fr (F.C.); Stephane.ESNOUF@cea.fr (S.E.)

<sup>3</sup> Ionisos SAS, 13 chemin du Pontet, 69380 Civrieux-d'Azergues, France; Sophie.Rouif@ionisos.com

<sup>4</sup> ArcNucleart, CEA Grenoble, 17 avenue des Martyrs, CEDEX 9, 38054 Grenoble, France; laurent.cortella@cea.fr

\* Correspondence: emmanuel.richaud@ensam.eu

## 1. Results on the elastic of the Valmy FFP2 mask

### 1.1. Characterization of the pristine FFP2 mask

The elastic strap of the Valmy FFP2 mask was analyzed by FTIR in ATR mode and according to the obtained spectrum (see Figure S1), this part of the mask is made of polyester. In the same way, Figure S2 presents the chromatogram of the elastic strap of the Valmy FFP2 medical mask. A very broad distribution of alkanes is observed between 8 and 20 min. The peak characteristic of butylated hydroxybenzene at 16.2 min is observed, along with peaks at 2.3 min and at 10.0 min, characteristic of 2-methyl-1,3-dioxolane and of acetic acid, respectively. Finally peaks characteristic of S-containing molecules (CS<sub>2</sub> and 2-(methylthio)benzothiazole, respectively) are observed at 1.5 min and at 17.2 min. Due to the function of the elastic strap, these molecules are very probably coming from a vulcanization process.

**Citation:** Richaud, E.; Ferry, M.; Carpentier, F.; Rouif, S.; Cortella, L. Sterilization Induced Changes in Polypropylene-Based Ffp2 Masks. *Polymers* **2021**, *13*, 4107.

<https://doi.org/10.3390/polym13234107>

Academic Editor(s): Alina Adams

Received: 28 September 2021

Accepted: 15 November 2021

Published: 25 November 2021

**Publisher's Note:** MDPI stays neutral with regard to jurisdictional claims in published maps and institutional affiliations.

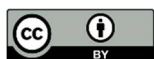

**Copyright:** © 2021 by the authors. Submitted for possible open access publication under the terms and conditions of the Creative Commons Attribution (CC BY) license (<https://creativecommons.org/licenses/by/4.0/>).

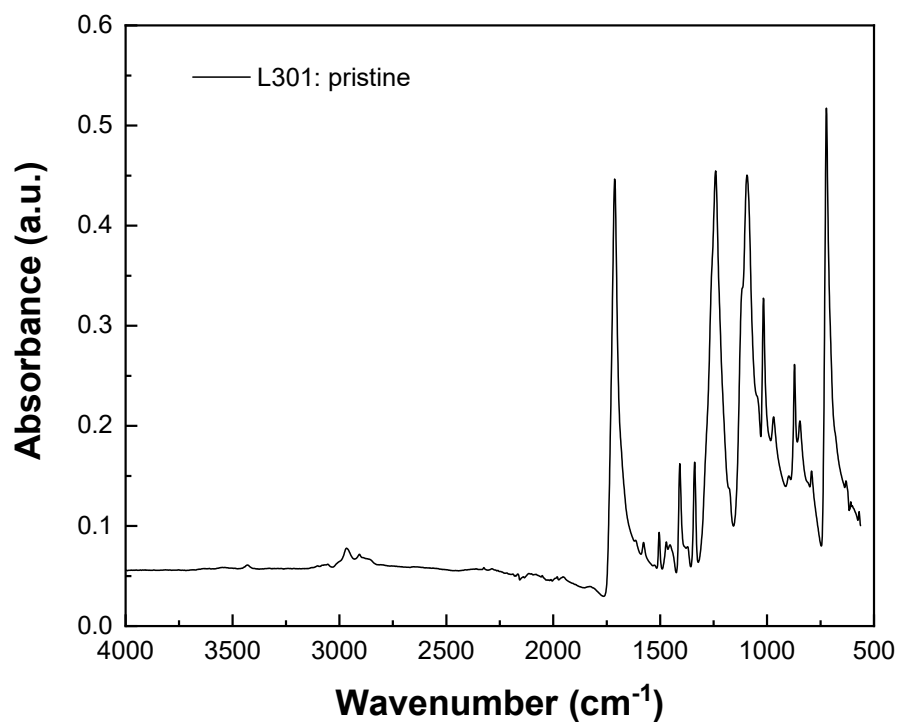

Figure S1. Infrared spectra of the elastic strap of the Valmy FFP2 mask.

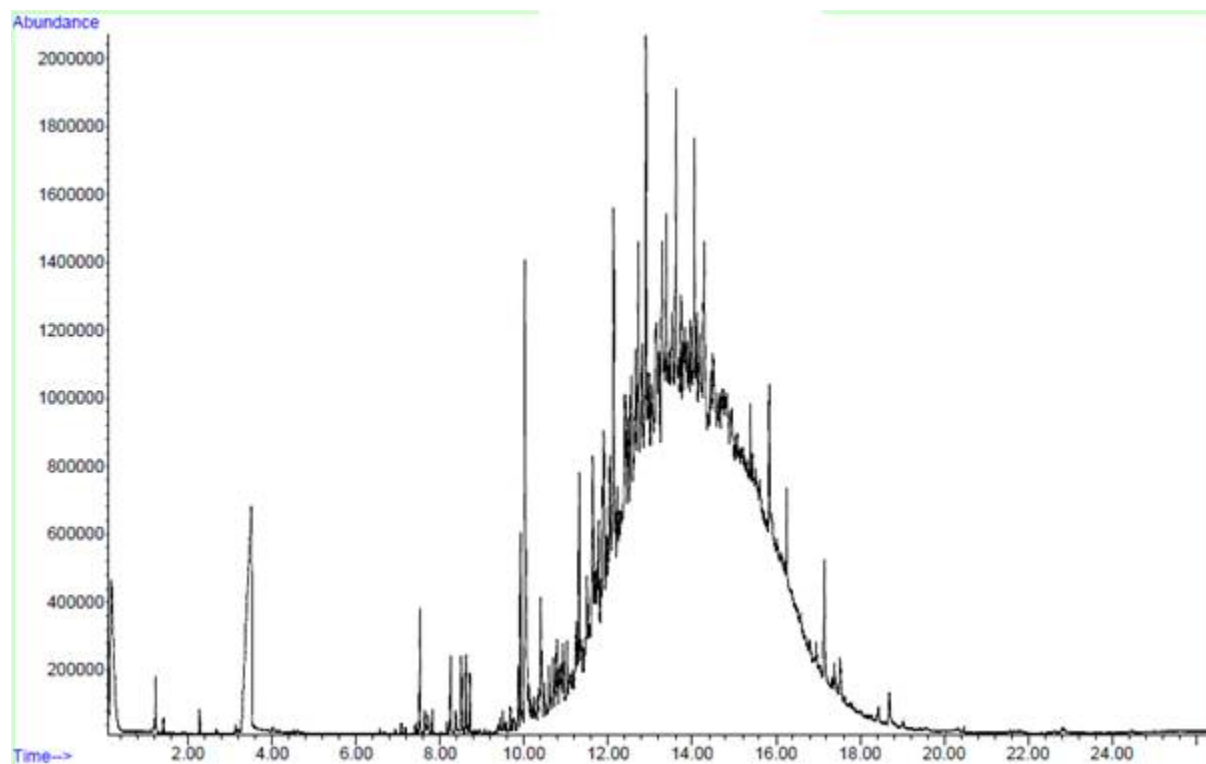

Figure S2. Chromatogram obtained by TD-GC-MS of the molecules trapped in the elastic strap of the Valmy FFP2 medical mask.

### 1.2. Characterization of the FFP2 mask after sterilization treatments

Figure S3 represents the elastic straps infrared spectra obtained after the different sterilization processes. No obvious modification could be evidenced whatever the sterilization protocol used.

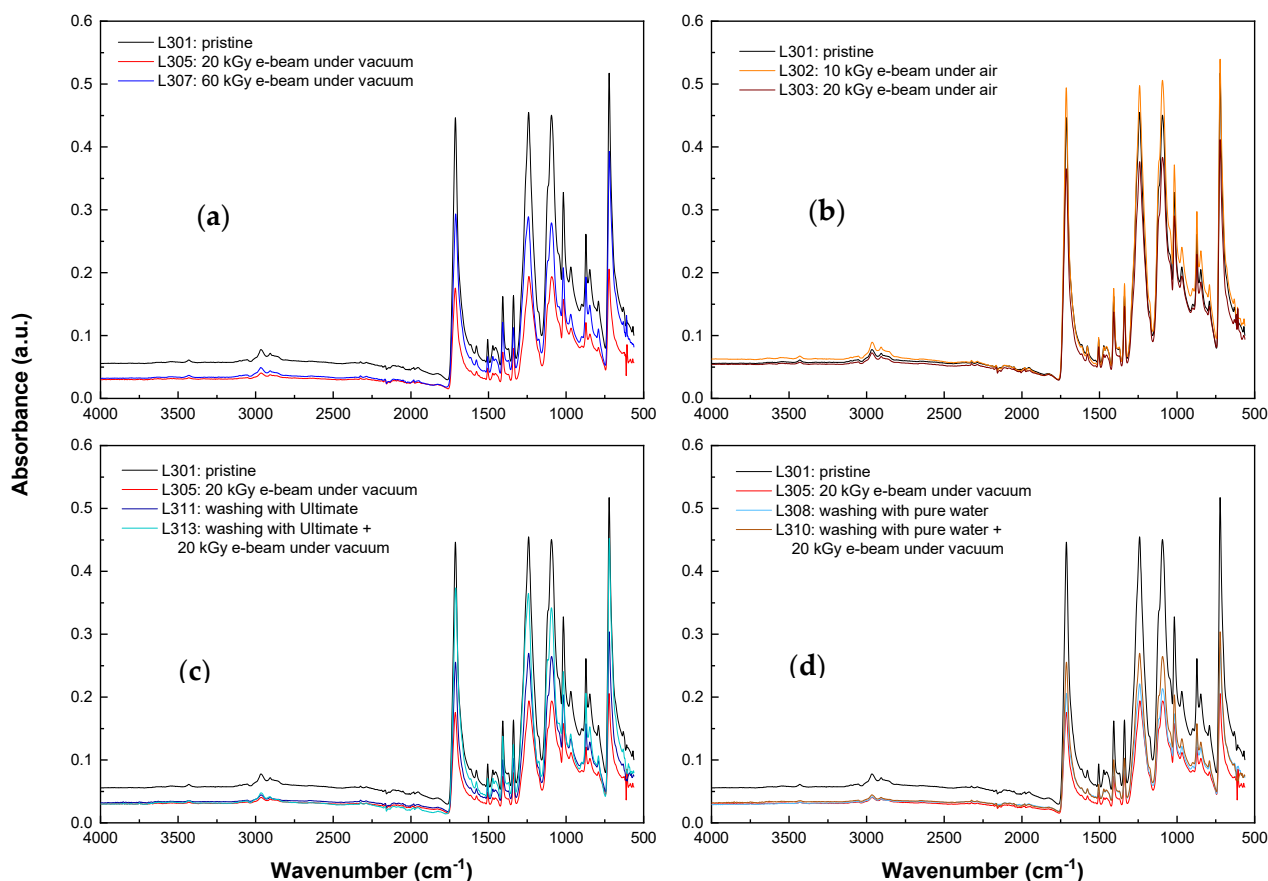

**Figure S3.** Infrared spectra of the elastic strap of the Valmy FFP2 mask before and after different sterilization protocols. (a) Irradiations under vacuum. (b) Irradiations under air. (c) Washing with pure water - and then irradiated using e-beam under vacuum or not. (d) Washing with Ultimate - and then irradiated using e-beam under vacuum or not.

Figure S4 presents the chromatograms for the elastic straps obtained using thermal desorption for the Valmy FFP2 medical mask. Peaks characteristic of fragments of a stabilizer of the hindered phenol family are evidenced, along with benzothiazole (14.2 min) and n-hexadecanoic acid (23.8 min). For all these molecules released in small quantities, the nature of the irradiation seems to have no marked effect: whatever the chosen sterilization protocol, S-containing degradation product molecules are identified.

The strap degradation is evidenced using TD-GC-MS: the strap will probably be the weakest part of the FFP2 Valmy mask.

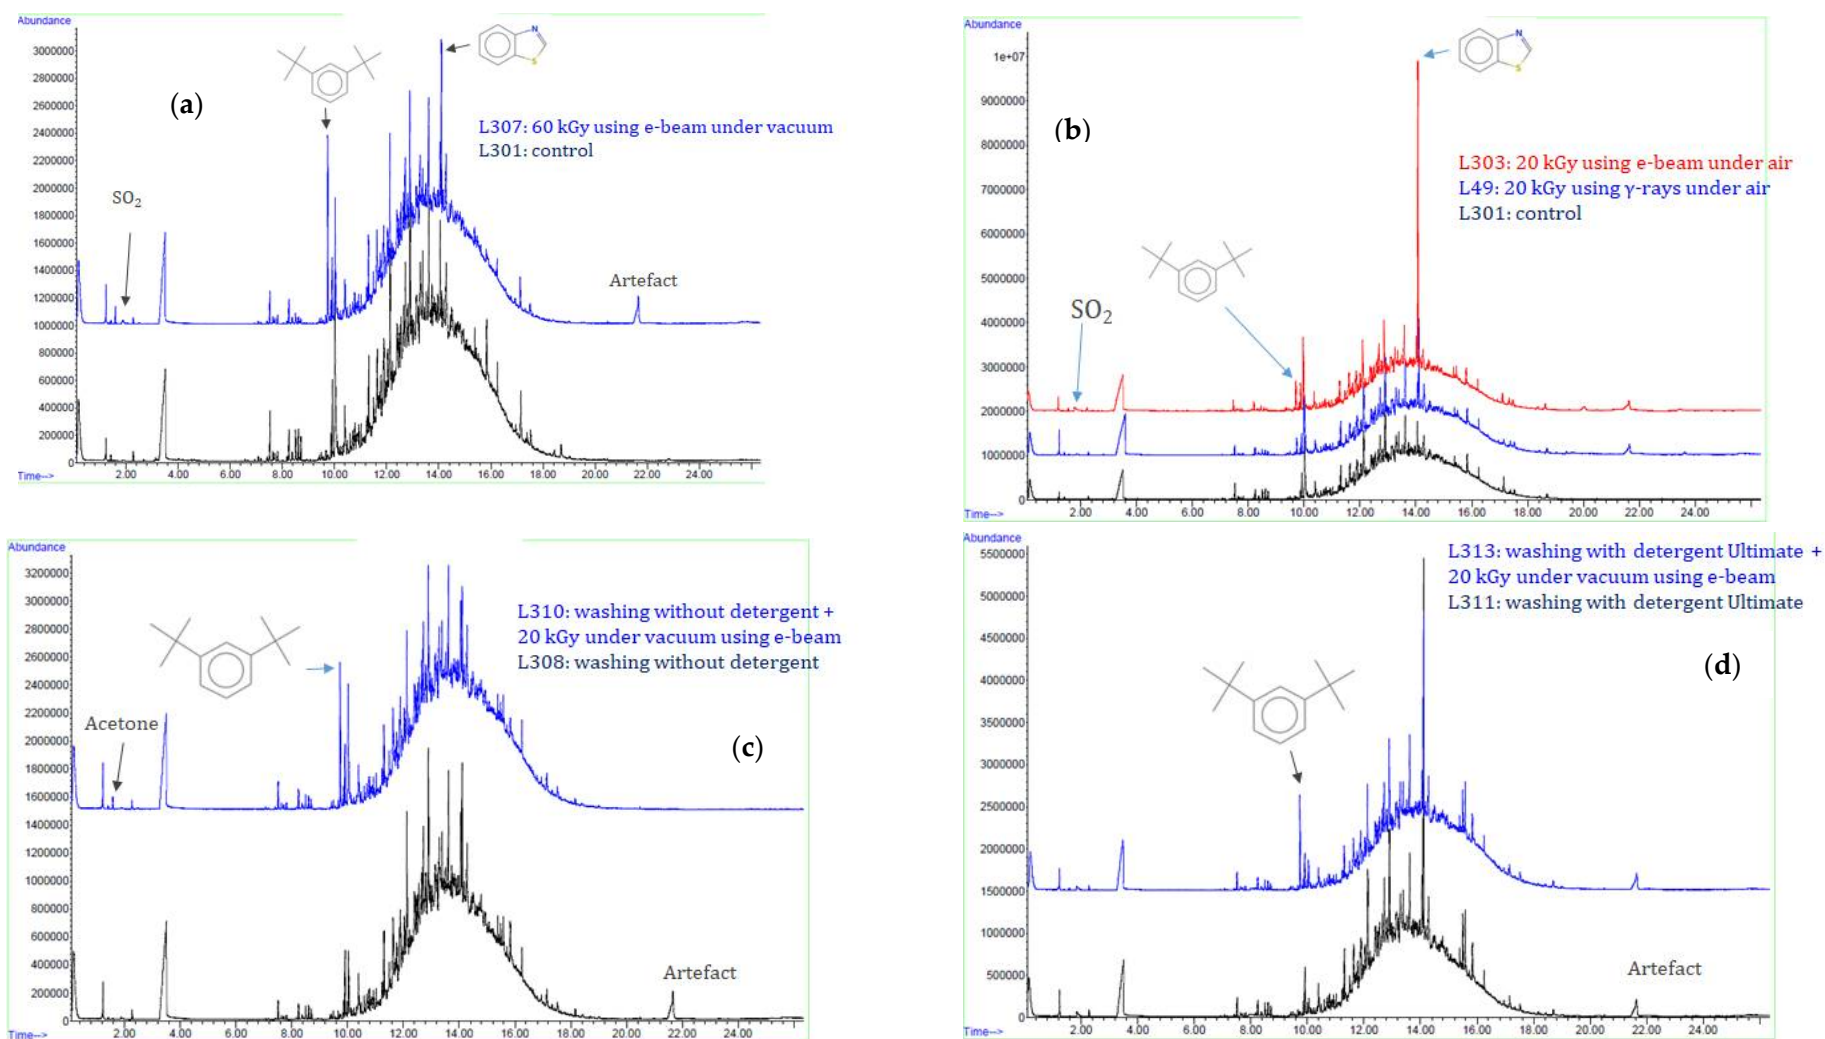

**Figure S4.** TD-GC-MS chromatograms of the elastic strap of the Valmy FFP2 mask under different conditions: (a) irradiated using e-beam under vacuum, (b) irradiated under air using e-beam and under  $\gamma$ -rays, (c) washed with pure water and then irradiated using e-beam under vacuum and (d) washed with Ultimate and then irradiated using e-beam under vacuum.

## 2. Complementary FTIR results on the four layers of the FFP2 mask

### 2.1. Infrared spectra of layer 2 and Layer 4 of the Valmy FFP2 mask

Figure S5 presents the layer 2 and layer 4 infrared spectra of the FFP2 mask in ATR mode.

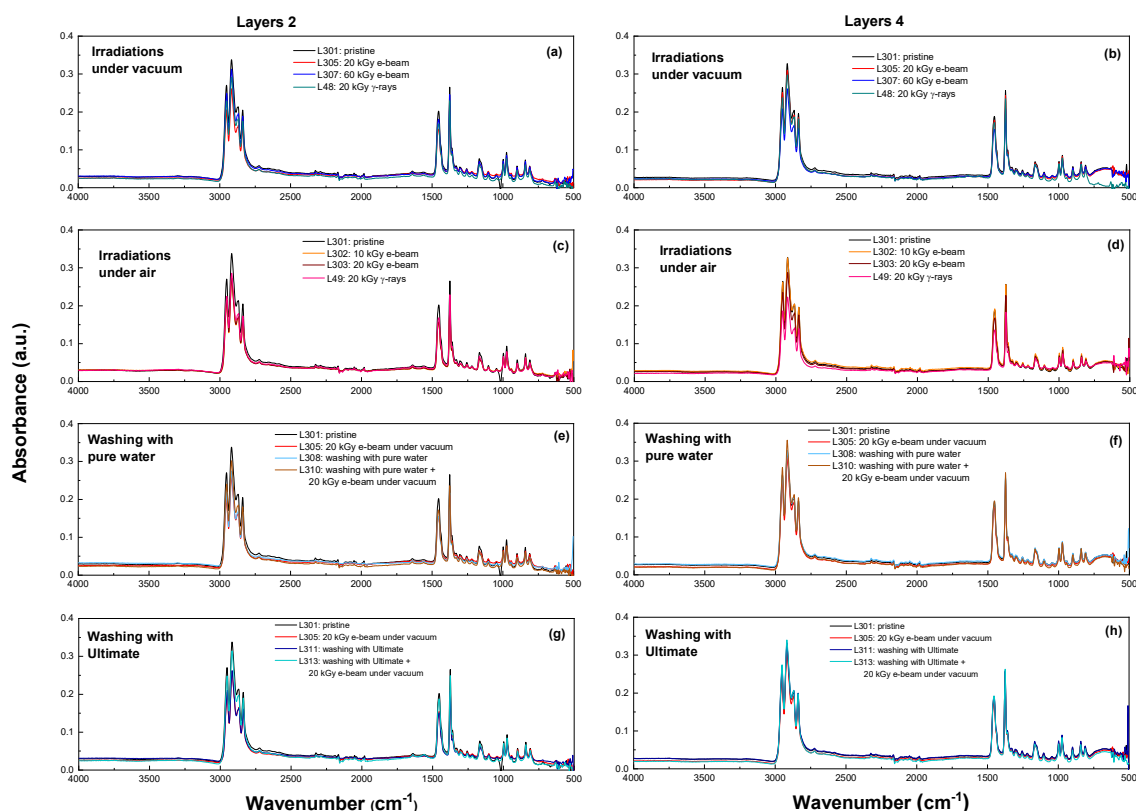

**Figure S5.** Infrared spectra of the Valmy FFP2 mask before and after different sterilization protocols. Line 1: Irradiations under vacuum (a: Layer 2 and b: Layer 4). Line 2: irradiations under air (c: Layer 2 and d: Layer 4). Line 3: Washing with pure water - and then irradiated using e-beam under vacuum or not - (e: Layer 2 and f: Layer 4). Line 4: Washing with Ultimate - and then irradiated using e-beam under vacuum or not - (g: Layer 2 and h: Layer 4).

### 2.2. Infrared spectra of layer 1 and Layer 3 of the Valmy FFP2 mask

Figure S6 presents the layer 1 and layer 3 infrared spectra of the FFP2 mask in ATR mode; Figure S7 presents, for these layers, the zooms in the areas 1800 - 1600 cm<sup>-1</sup> (C=O area) and 1100 - 700 cm<sup>-1</sup> (C=C area) of the infrared spectra of the FFP2 mask in ATR mode.

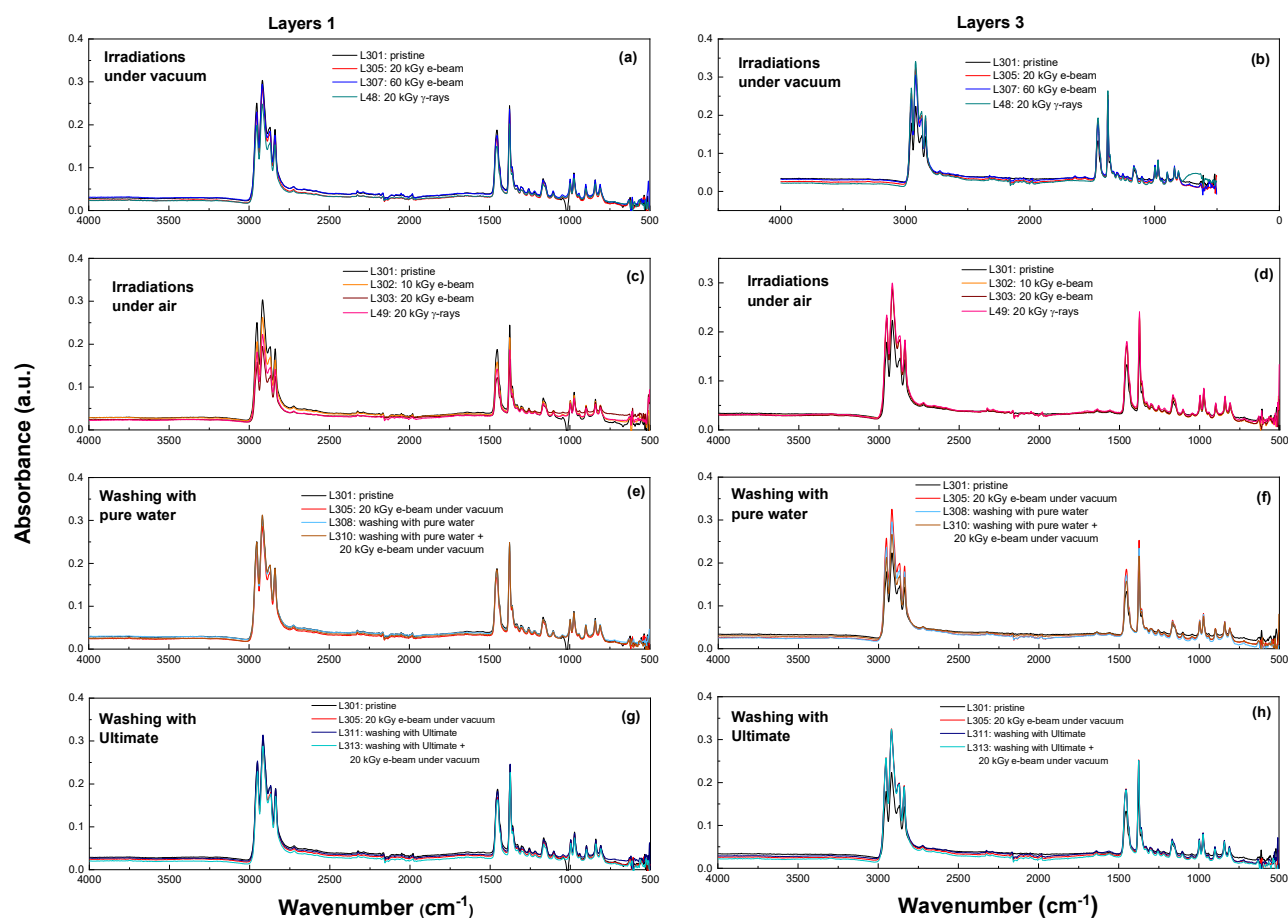

**Figure S6.** Infrared spectra of the Valmy FFP2 mask in ATR mode before and after different sterilization protocols. Line 1: Irradiations under vacuum (a: Layer 1 and b: Layer 3). Line 2: irradiations under air (c: Layer 1 and d: Layer 3). Line 3: Washing with pure water - and then irradiated using e-beam under vacuum or not - (e: Layer 1 and f: Layer 3). Line 4: Washing with Ultimate - and then irradiated using e-beam under vacuum or not - (g: Layer 1 and h: Layer 3).

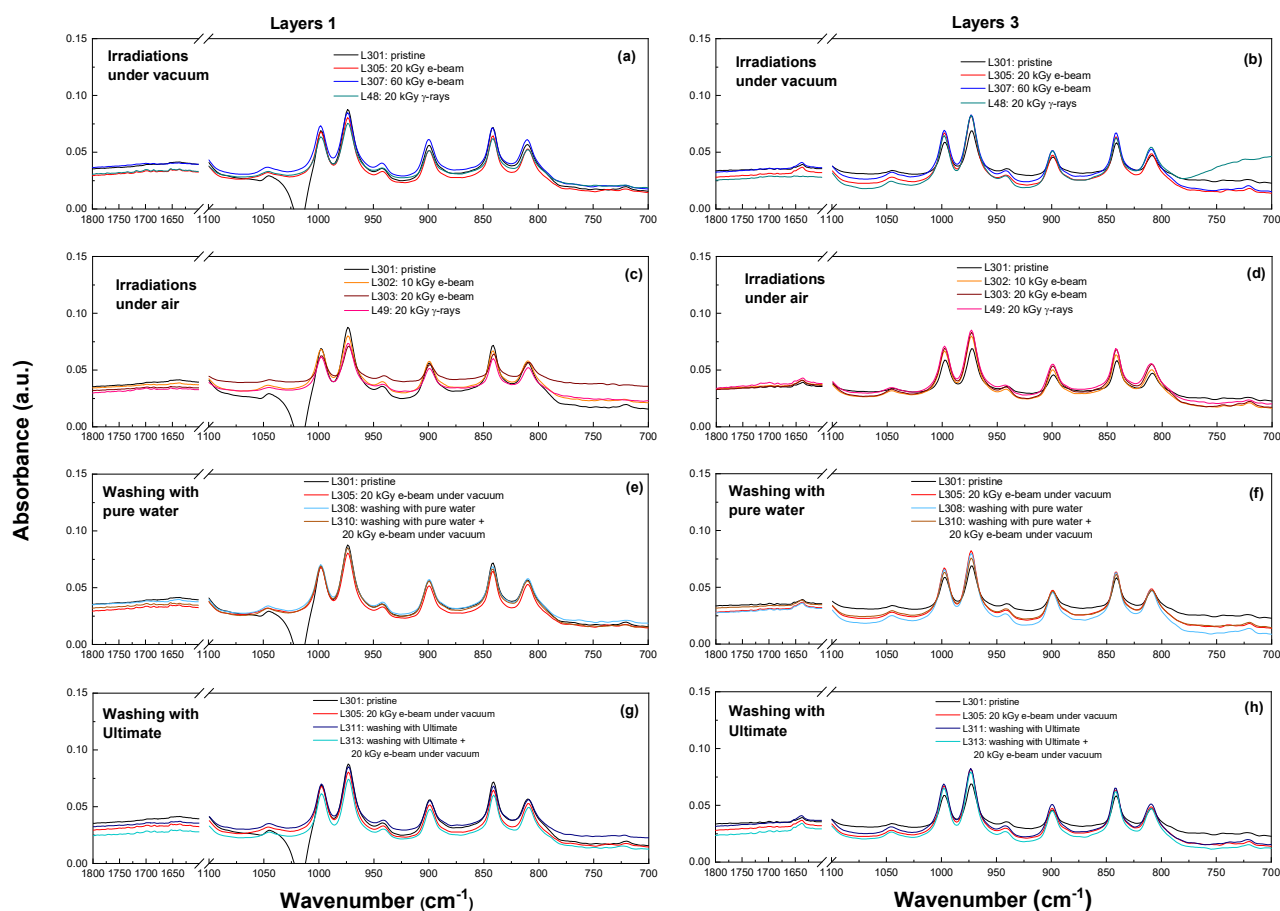

**Figure S7.** Infrared spectra of layer 1 and layer 3 of the Valmy FFP2 mask in ATR mode, before and after different sterilization protocols. Zooms in the areas 1800–1600  $\text{cm}^{-1}$  (C=O area) and 1100–700  $\text{cm}^{-1}$  (C=C area). Line 1: Irradiations under vacuum (**a**: Layer 1 and **b**: Layer 3). Line 2: irradiations under air (**c**: Layer 1 and **d**: Layer 3). Line 3: Washing with pure water - and then irradiated using e-beam under vacuum or not - (**e**: Layer 1 and **f**: Layer 3). Line 4: Washing with Ultimate - and then irradiated using e-beam under vacuum or not - (**g**: Layer 1 and **h**: Layer 3).

### 2.3. Crystallinity evolutions determined using FTIR

Table S1 gathers the values of the crystallinity percentages evolutions obtained as a function of the layer under consideration and of the sterilization protocol process applied.

| Sample number | Sterilization treatment     | Dose (kGy) | Layer number | A <sub>997</sub> | A <sub>972</sub> | A <sub>917</sub> | %Crystallinity |
|---------------|-----------------------------|------------|--------------|------------------|------------------|------------------|----------------|
| L301          | Pristine                    | 0          | 1            | 0.0440           | 0.0630           | 0.0280           | 18.4           |
|               |                             |            | 2            | 0.0520           | 0.0710           | 0.0320           | 24.5           |
|               |                             |            | 3            | 0.0284           | 0.0388           | 0.0154           | 29.2           |
|               |                             |            | 4            | 0.0425           | 0.0586           | 0.0260           | 23.8           |
| L49           | $\gamma$ -rays under air    | 20         | 1            | 0.0300           | 0.0422           | 0.0190           | 20.3           |
|               |                             |            | 2            | 0.0414           | 0.0546           | 0.0232           | 31.8           |
|               |                             |            | 3            | 0.0420           | 0.0564           | 0.0246           | 28.2           |
|               |                             |            | 4            | 0.0288           | 0.0390           | 0.0155           | 30.3           |
| L48           | $\gamma$ -rays under vacuum | 20         | 1            | 0.0358           | 0.0477           | 0.0225           | 26.1           |
|               |                             |            | 2            | 0.0456           | 0.0596           | 0.0270           | 30.8           |
|               |                             |            | 3            | 0.0462           | 0.0638           | 0.0292           | 22.2           |
|               |                             |            | 4            | 0.0467           | 0.0617           | 0.0277           | 29.5           |
| L302          | e-beam under air            | 10         | 1            | 0.0375           | 0.0496           | 0.0256           | 22.6           |
|               |                             |            | 2            | 0.0371           | 0.0491           | 0.0200           | 32.7           |
|               |                             |            | 3            | 0.0413           | 0.0547           | 0.0234           | 30.9           |
|               |                             |            | 4            | 0.0470           | 0.0621           | 0.0279           | 29.5           |
| L303          | e-beam under air            | 20         | 1            | 0.0230           | 0.0310           | 0.0139           | 26.6           |
|               |                             |            | 2            | 0.0377           | 0.0502           | 0.0213           | 30.5           |
|               |                             |            | 3            | 0.0432           | 0.0575           | 0.0260           | 28.1           |
|               |                             |            | 4            | 0.0370           | 0.0509           | 0.0212           | 26.6           |
| L305          | e-beam under vacuum         | 20         | 1            | 0.0432           | 0.0562           | 0.0265           | 29.9           |
|               |                             |            | 2            | 0.0336           | 0.0459           | 0.0218           | 22.0           |
|               |                             |            | 3            | 0.0451           | 0.0605           | 0.0242           | 31.4           |
|               |                             |            | 4            | 0.0425           | 0.0578           | 0.0248           | 27.1           |
| L307          | e-beam under vacuum         | 60         | 1            | 0.0434           | 0.0552           | 0.0298           | 27.0           |
|               |                             |            | 2            | 0.0459           | 0.0607           | 0.0269           | 29.9           |
|               |                             |            | 3            | 0.0441           | 0.0581           | 0.0251           | 31.4           |
|               |                             |            | 4            | 0.0350           | 0.0474           | 0.0223           | 23.8           |
| L308          | Washed with pure water      | 0          | 1            | 0.0432           | 0.0582           | 0.0277           | 24.0           |
|               |                             |            | 2            | 0.0352           | 0.0471           | 0.0180           | 33.0           |
|               |                             |            | 3            | 0.0401           | 0.0530           | 0.0224           | 31.6           |
|               |                             |            | 4            | 0.0457           | 0.0618           | 0.0273           | 26.7           |
| L310          | Washed with pure water + e- | 20         | 1            | 0.0440           | 0.0601           | 0.0282           | 22.6           |
|               |                             |            | 2            | 0.0437           | 0.0574           | 0.0243           | 32.5           |

|      |                                                        |    |   |        |        |        |      |
|------|--------------------------------------------------------|----|---|--------|--------|--------|------|
|      | beam under vacuum                                      |    | 3 | 0.0480 | 0.0625 | 0.0264 | 33.8 |
|      |                                                        |    | 4 | 0.0517 | 0.0662 | 0.0307 | 33.1 |
| L311 | Washed with detergent (Ultimate)                       | 0  | 1 | 0.0402 | 0.0556 | 0.0235 | 25.3 |
|      |                                                        |    | 2 | 0.0331 | 0.0441 | 0.0168 | 33.7 |
|      |                                                        |    | 3 | 0.0451 | 0.0592 | 0.0264 | 30.7 |
|      |                                                        |    | 4 | 0.0483 | 0.0636 | 0.0285 | 30.1 |
| L313 | Washed with detergent (Ultimate) + e-beam under vacuum | 20 | 1 | 0.0394 | 0.0521 | 0.0239 | 28.5 |
|      |                                                        |    | 2 | 0.0493 | 0.0639 | 0.0283 | 32.9 |
|      |                                                        |    | 3 | 0.0458 | 0.0625 | 0.0252 | 28.8 |
|      |                                                        |    | 4 | 0.0477 | 0.0644 | 0.0286 | 26.8 |

**Table S1.** Crystallinities evolutions as a function of the layer under consideration and of the sterilization protocol process applied.

### 2.1. Identification of the different peaks observed using TD-GC-MS

Figure S8 presents the chromatograms obtained using thermal desorption for the Valmy FFP2 medical mask for the four layers altogether, before and after sterilization under different conditions: (a) washed with pure water - and then irradiated using e-beam under vacuum or not - and (b) washed with Ultimate - and then irradiated using e-beam under vacuum or not -.

It is believed that the loss of caprolactone but also the decrease of high molar mass alkanes are due to the washing process. In fact, a standard personal washing machine was used and the observed difference might be due to residues inside this household machine.

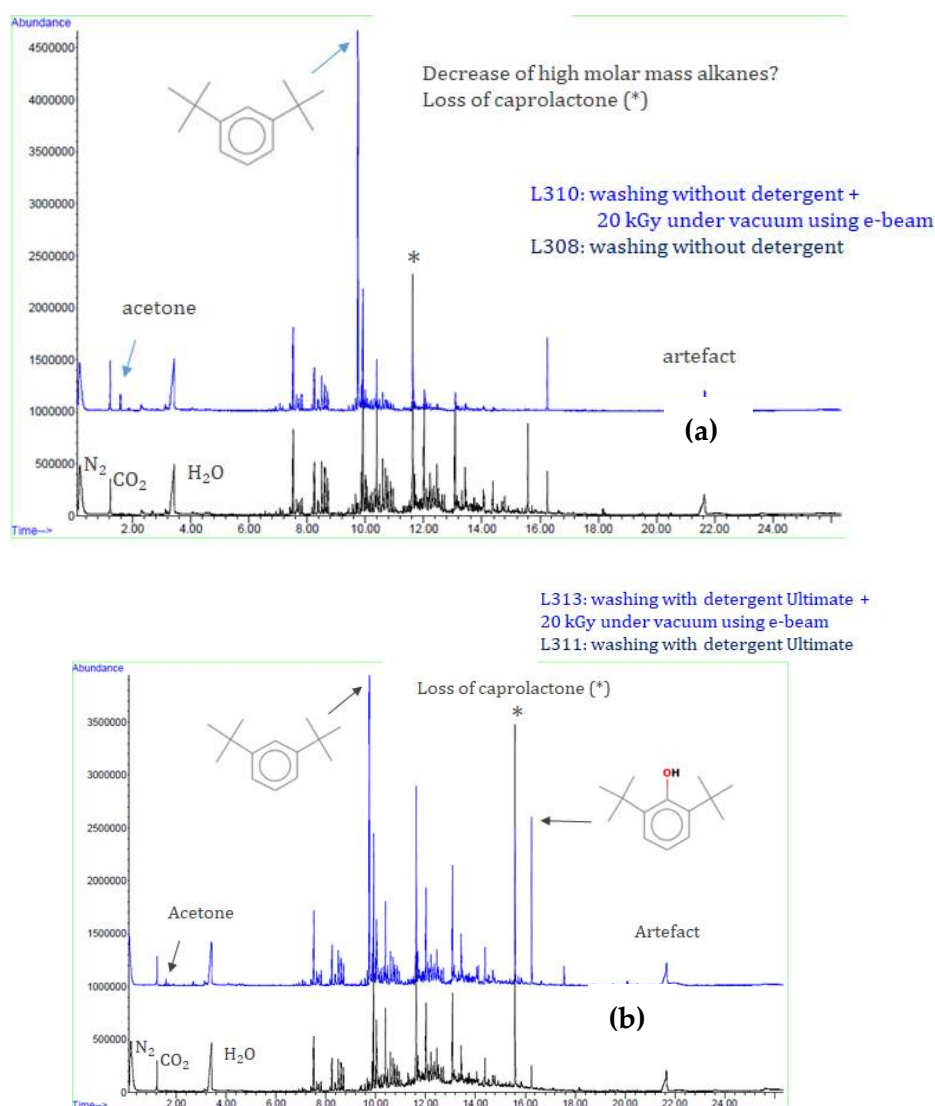

**Figure S8.** TD-GC-MS chromatograms of the four layers altogether of the Valmy FFP2 mask under different conditions: (a) washed with pure water - and then irradiated using e-beam under vacuum or not - and (b) washed with Ultimate - and then irradiated using e-beam under vacuum or not -.
